# Supplementary material for: Identification of the radiolytic product of hydrophobic ionic liquid [C4mim][NTf2] during removal of Sr2+ from aqueous solution
Source: Royal Society of Chemistry journal article supplement (doi:10.1039/b911026g), 2009-01-01
Supplement: b911026g.pdf [file b911026g.pdf]

## Supplementary Information Figure Caption

**Fig. S1** SEM and energy dispersive X-ray spectroscopy (EDS) spectra of the precipitate separated from the interface of irradiated [C<sub>4</sub>mim][NTf<sub>2</sub>] and aqueous solution of Sr<sup>2+</sup>. The contacting time of the two phases is less than 2 weeks (left) and more than 2 months (right), respectively.

**Fig. S2** <sup>1</sup>H NMR spectra of unirradiated [C<sub>4</sub>mim][NTf<sub>2</sub>] and irradiated [C<sub>4</sub>mim][NTf<sub>2</sub>] at 400 kGy after contacting with aqueous solution of Sr<sup>2+</sup> for 1 month. Deuterated DMSO was used as solvent in the measurements.

**Fig. S3** FTIR spectra of unirradiated [C<sub>4</sub>mim][NTf<sub>2</sub>] and irradiated [C<sub>4</sub>mim][NTf<sub>2</sub>] at 400 kGy after contacting with aqueous solution of Sr<sup>2+</sup> for 1 month. The spectra were recorded as liquid films between KBr plates.

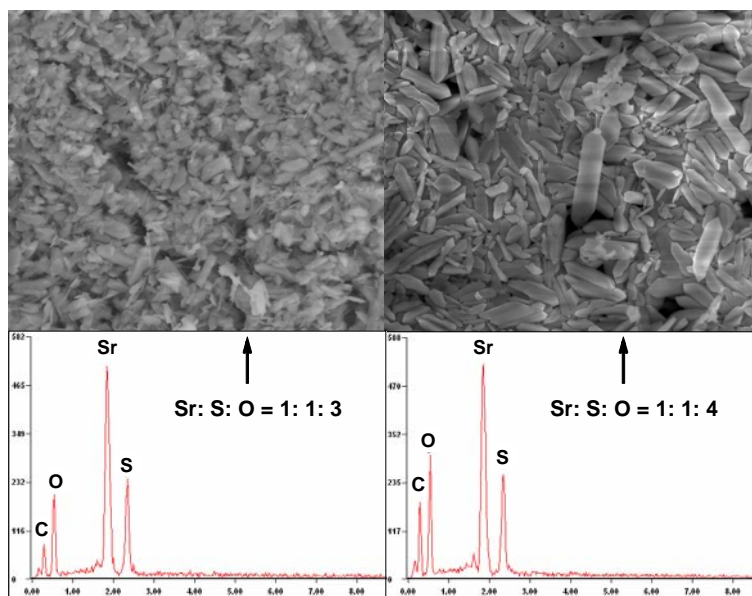

**Fig. S1** SEM and energy dispersive X-ray spectroscopy (EDS) spectra of the precipitate separated from the interface of irradiated  $[C_4mim][NTf_2]$  and aqueous solution of  $Sr^{2+}$ . The contact time of the two phases is less than 2 weeks (left) and more than 2 months (right), respectively. C element in EDS is attributed to adventitious hydrocarbons due to exposure to air.

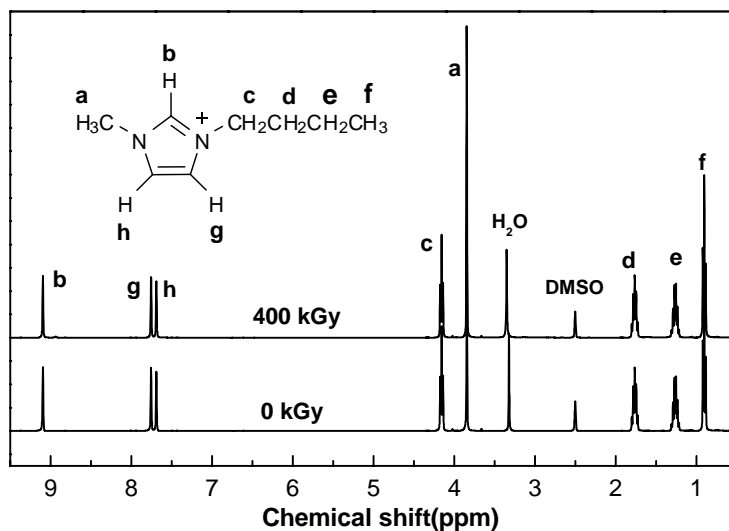

**Fig. S2** <sup>1</sup>H NMR spectra of unirradiated [C<sub>4</sub>mim][NTf<sub>2</sub>] and irradiated [C<sub>4</sub>mim][NTf<sub>2</sub>] at 400 kGy after contacting with aqueous solution of Sr<sup>2+</sup> for 1 month. Deuterated DMSO was used as solvent in the measurements. The comparison shows no discernible differences in the two spectra.

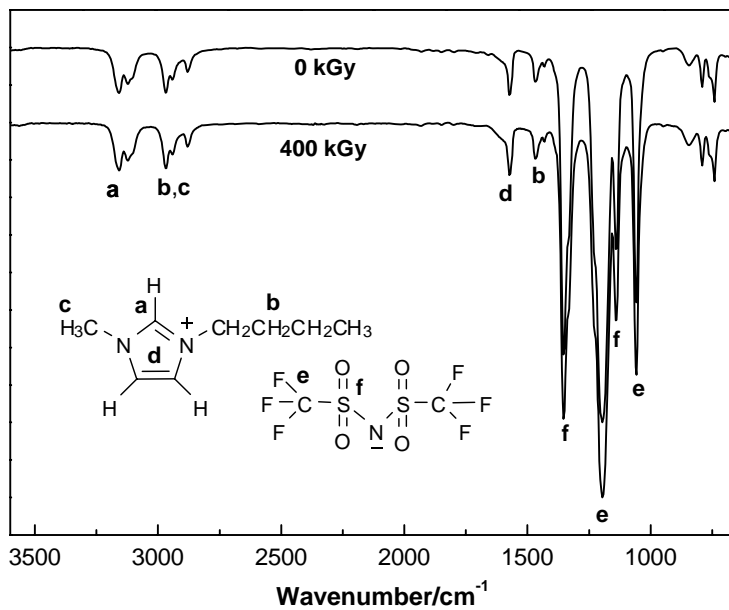

**Fig. S3** FTIR spectra of unirradiated [C<sub>4</sub>mim][NTf<sub>2</sub>] and irradiated [C<sub>4</sub>mim][NTf<sub>2</sub>] at 400 kGy after contacting with aqueous solution of Sr<sup>2+</sup> for 1 month. The spectra were recorded as liquid films between KBr plates. The comparison shows no discernible differences in the two spectra.
